# Supplementary material
Source: PubMed Central journal article supplement (PMC5561454)
Supplement: NIHMS880434-supplement-Supp_figures.pdf [file NIHMS880434-supplement-Supp_figures.pdf]

### Supporting Table S1

Mean signal intensities (%) of the normal and acidic ischemic areas for a representative patient corresponding to Fig. 2 (mean  $\pm$  STD)

| Time after last seen normal | MTR(10ppm)                                                               | MTR <sub>asym</sub> (3.5ppm)         | APT <sup>#</sup>                                                         | NOE <sup>#</sup>                                                         |
|-----------------------------|--------------------------------------------------------------------------|--------------------------------------|--------------------------------------------------------------------------|--------------------------------------------------------------------------|
| At 6 hr 40 min              | 28.7 $\pm$ 3.9<br>vs. 27.3 $\pm$ 4.4                                     | 0.76 $\pm$ 0.5<br>vs. 0.03 $\pm$ 0.2 | <b>2.93 <math>\pm</math> 1.1</b><br>vs. <b>1.17 <math>\pm</math> 0.3</b> | <b>2.17 <math>\pm</math> 1.2</b><br>vs. <b>1.14 <math>\pm</math> 0.3</b> |
| At 1 day                    | 29.7 $\pm$ 5.2<br>vs. 26.2 $\pm$ 2.8                                     | 0.82 $\pm$ 0.2<br>vs. 0.36 $\pm$ 0.2 | <b>2.95 <math>\pm</math> 1.2</b><br>vs. <b>1.02 <math>\pm</math> 0.5</b> | <b>2.12 <math>\pm</math> 1.1</b><br>vs. <b>0.66 <math>\pm</math> 0.5</b> |
| At 1 week                   | <b>32.4 <math>\pm</math> 3.5</b><br>vs. <b>17.5 <math>\pm</math> 2.6</b> | 0.32 $\pm$ 0.2<br>vs. 0.16 $\pm$ 0.9 | <b>3.04 <math>\pm</math> 0.2</b><br>vs. <b>1.71 <math>\pm</math> 0.6</b> | <b>2.73 <math>\pm</math> 0.3</b><br>vs. <b>1.55 <math>\pm</math> 0.5</b> |

Bold: Differences were found significant ( $p < 0.05$ ).

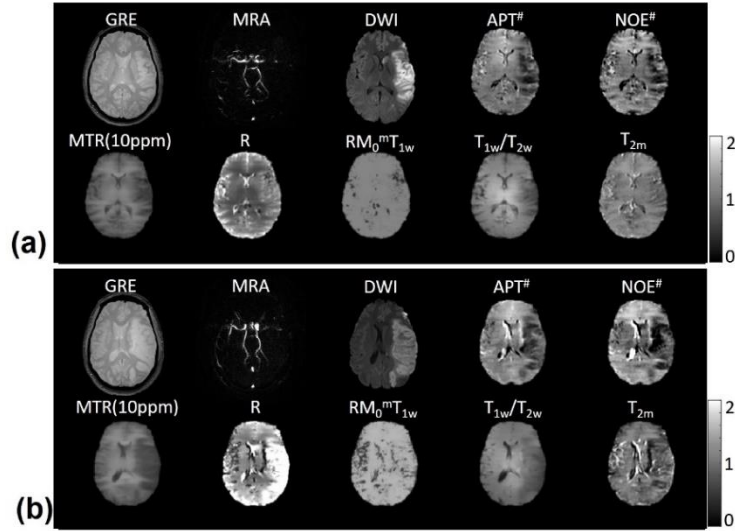

**Supporting Fig. S1.** Conventional, APT<sup>#</sup>, NOE<sup>#</sup>, and MT-related MR images of a representative acute stroke patient with left MCA occlusion at <math>< 7</math> hrs (a) and 1 week (b). APT<sup>#</sup>, NOE<sup>#</sup>, MTR(10ppm), R, RM<sub>0</sub>mT<sub>1w</sub>, T<sub>1w</sub>/T<sub>2w</sub> and T<sub>2m</sub> images were normalized by the mean value of the contralateral normal appearing white matter. There were obvious APT and NOE image contrasts at the early time point, at which the image contrasts of the MT-related images were negligible (a). In contrast, although APT and NOE image contrasts remained almost unchanged, the MT-related images show some contrast at 1 week time point (b).

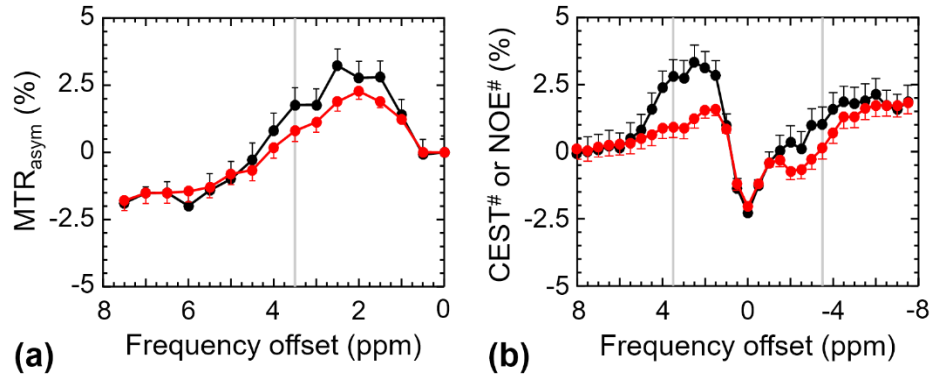

**Supporting Fig. S2.** (a) Average  $MTR_{\text{asym}}$  and (b)  $APT^{\#}$  and  $NOE^{\#}$  signals obtained from the contralateral normal (black) and the ischemic lesion (red) from twenty acute stroke patients at < 1 day from symptom onset.
